# Supplementary material for: The SOXE transcription factors—SOX8, SOX9 and SOX10—share a bi-partite transactivation mechanism
Source: PubMed Central journal article supplement — Nucleic Acids Res. 2019 Jun 13;47(13):6917–31. doi: 10.1093/nar/gkz523 (PMC6649842; doi:10.1093/nar/gkz523), 2019-06-13
Supplement: gkz523_supplemental_file.pdf [file gkz523_supplemental_file.pdf]

## SUPPLEMENTARY DATA

### SUPPLEMENTARY TABLES

**Table S1.** NCBI accession numbers for SOX protein sequences used in this study

| Protein                                                       | Animal Species                                                | Reference Sequence |
|---------------------------------------------------------------|---------------------------------------------------------------|--------------------|
| SOX8                                                          | Human ( <i>Homo sapiens</i> )                                 | NP_055402.2        |
|                                                               | Mouse ( <i>Mus musculus</i> )                                 | NP_035577.1        |
|                                                               | Dog ( <i>Canis familiaris</i> )                               | XP_022275986       |
|                                                               | Chicken ( <i>Gallus gallus</i> )                              | AAF73917.1         |
|                                                               | African clawed frog ( <i>Xenopus laevis</i> )                 | AAQ67212.1         |
|                                                               | Coelacanth ( <i>Latimeria menadoensis</i> )                   | XP_005993175.1     |
|                                                               | Zebrafish ( <i>Danio rerio</i> )                              | AAX73357.1         |
| SOX9                                                          | Human ( <i>Homo sapiens</i> )                                 | CAA86598.1         |
|                                                               | Mouse ( <i>Mus musculus</i> )                                 | NP_035578.3        |
|                                                               | Dog ( <i>Canis familiaris</i> )                               | AAP69840.1         |
|                                                               | Chicken ( <i>Gallus gallus</i> )                              | NP_989612.1        |
|                                                               | African claw frog ( <i>Xenopus laevis</i> )                   | AAI70060.1         |
|                                                               | Coelacanth ( <i>Latimeria menadoensis</i> )                   | CCP19141           |
|                                                               | Zebrafish ( <i>Danio rerio</i> )                              | NP_571718.1        |
| Lamprey [SOXE3] ( <i>Petromyzon marinus</i> )                 | ABC58685.1                                                    |                    |
| SOX10                                                         | Human ( <i>Homo sapiens</i> )                                 | CAG38808.1         |
|                                                               | Mouse ( <i>Mus musculus</i> )                                 | AAH25171.1         |
|                                                               | Dog ( <i>Canis familiaris</i> )                               | XP_538379.3        |
|                                                               | Chicken ( <i>Gallus gallus</i> )                              | NP_990123.1        |
|                                                               | African claw frog ( <i>Xenopus laevis</i> )                   | NP_001082358.1     |
|                                                               | Coelacanth ( <i>Latimeria menadoensis</i> )                   | XP_006002010.1     |
|                                                               | Zebrafish ( <i>Danio rerio</i> )                              | AAK84872.1         |
| SOXE                                                          | Sea squirt ( <i>Ciona intestinalis</i> )                      | CAD58841           |
|                                                               | Green sea urchin ( <i>Lytechinus variegatus</i> )             | ALG35687.1         |
|                                                               | Common fruit fly ( <i>Drosophila melanogaster</i> )           | CAB63903.1         |
|                                                               | Velvet worm ( <i>Euperipatoides kanangrensis</i> )            | SOB55490.1         |
|                                                               | Common cuttlefish ( <i>Sepia officinalis</i> )                | AGL08099           |
| Starlet sea anemone [SOXE1] ( <i>Nematostella vectensis</i> ) | ABA02365.1                                                    |                    |
| SOX7                                                          | Human ( <i>Homo sapiens</i> )                                 | CAC84226.1         |
| SOX17                                                         | Human ( <i>Homo sapiens</i> )                                 | BAB83867.1         |
|                                                               | African clawed frog [SOX17B] ( <i>Xenopus laevis</i> )        | NP_001081633.1     |
| SOX18                                                         | Human ( <i>Homo sapiens</i> )                                 | BAA94874.1         |
|                                                               | Chicken ( <i>Gallus gallus</i> )                              | AAK71352.1         |
| SOXF                                                          | Lamprey ( <i>Petromyzon marinus</i> )                         | AAW34333.1         |
|                                                               | Velvet worm ( <i>Euperipatoides kanangrensis</i> )            | SOB55491.1         |
|                                                               | Starlet sea anemone [SOXE1] ( <i>Nematostella vectensis</i> ) | ABA02366.1         |

**Table S2.** Primers used to generate plasmids encoding SOX proteins and variants thereof

| Plasmid name                          | Forward primer                   | Reverse primer                    |
|---------------------------------------|----------------------------------|-----------------------------------|
| pCDNA-3xFLAG-hSOX9 WT                 | TAGTGGATCCATGAATCTCCTGGACC       | CGAGGTCGACGGTATCGATAAGCT          |
| pCDNA-3xFLAG-hSOX9 <sup>ATAC</sup>    | TAGTGGATCCATGAATCTCCTGGACC       | GCAGAATTCTCAGCCCGGCTCGCTGCTCAGCGT |
| pCDNA-3xFLAG-hSOX9 <sup>[1-338]</sup> | TAGTGGATCCATGAATCTCCTGGACC       | GCAGAATTCTCACTTGGACATCCACACGTGGCC |
| pCDNA-3xFLAG-hSOX9 <sup>[1-307]</sup> | TAGTGGATCCATGAATCTCCTGGACC       | GCAGAATTCTCAGGCACCCCGGGTGGCCGT    |
| pCDNA-3xFLAG-hSOX9 <sup>[1-224]</sup> | TAGTGGATCCATGAATCTCCTGGACC       | GCAGAATCCTCAGTGCTCGCCGGGGAGTGACA  |
| pCDNA-3xFLAG-hSOX9 <sup>ATAM</sup>    | GAGCACCCGGGCAAGGCTGACCTGAAGCGAGA | GCCCGGGTCTCGCCGGGGAGTGACACCTC     |
| pCDNA-3xFLAG-hSOX9 <sup>ATAM-A</sup>  | GAGCACCCGGGCAAGGCGAC CTGAAGCGAGA | GCCCGGGTCTCGCCGGGGAGTGACACCTC     |
| pCDNA-3xFLAG-hSOX9 <sup>ATAM-B</sup>  | CAGCCG GCGCCCTATCGACTTCCGC       | GATAGGGGGCCCGGCTGCACGTCGGT        |
| pCDNA-3xFLAG-hSOX9 <sup>ATAM-C</sup>  | CAGCCCTTCCAACATCGAGACCTTC        | GATGTTGAAGGGGGCTGTCTGCCCC         |
| pCDNA-3xFLAG-hSOX9 <sup>ATAM-D</sup>  | ATCTCAAACCCGGGGTCCCGGCCACG       | CACCCCGGGTTGGAGATGACGTCGCT        |
| pCDNA-3xFLAG-hSOX9 <sup>APQA</sup>    | CAGCGTGTCTTGGACATCCACACGTG       | ATGTCCAAGCACACGCTGACCACGCTG       |
| pCDNA-3xFLAG-hSOX9 <sup>AE-L</sup>    | GATGTCAACCCGCCAACGGCCACCCGGGGT   | GTTGGCGGGTTGACATCGAAGGTCTCGATG    |
| pCDNA-3xFLAG-hSOX8                    | GACGGGATCCATGCTGGACATGAGCGAGGCC  | CGTGAATTCTCAGGGCCTGGTCAGGGTGGT    |
| pCDNA-3xFLAG-hSOX8 <sup>ATAC</sup>    | GACGGGATCCATGCTGGACATGAGCGAGGCC  | GCAGAATTCTCAGCTCTGGTGGGCGACGCGGAG |
| pCDNA-3xFLAG-hSOX8 <sup>ATAM</sup>    | CATGGCGACCACCCGGGCCAGGCCTATGGG   | TAGGCCTGGCCCGGGTGGTCCCATGGTGGT    |
| pCDNA-3xFLAG-hSOX10                   | GACGGGATCCATGGCGGAGGAGCAGGACCTA  | CGTGAATTCTTAGGGCCGGACAGTGTCT      |
| pCDNA-3xFLAG-hSOX10 <sup>ATAC</sup>   | GACGGGATCCATGGCGGAGGAGCAGGACCTA  | GCAGAATTCTTAACAGGTGGTGGACCGTG     |
| pCDNA-3xFLAG-hSOX10 <sup>ATAM</sup>   | CCCGAGCACCCAGCAGCTACTCAGCAGCC    | TGAGTAGTCTGGGGTCTCGGGTTCCCAT      |
| pCDNA-3xFLAG-hSOX9 [SOX8TAM]          | CAGTCCCGGGGACCACACAGGGCAGAC      | CAGTCCCGGGGGCCGCCAGGGCAGGTA       |
| pCDNA-3xFLAG-hSOX9 [SOX10TAM]         | CAGTCCCGGG CACCCCTCAGGCCAGAGC    | CAGTCCCGGGTCCCATTTGGGCGGCAGGTA    |
| pCDNA-3xFLAG-hSOX9 [SOX8TAC]          | GGCCAGTCCAGCGGCCGCACATCAAGACG    | GATGTGCGCCGCTGGGACTGGCCCGGCTC     |
| pCDNA-3xFLAG-hSOX9 [SOX10TAC]         | GGCCAGTCCAGAAAGCCAGGTGAAGACA     | CACCTGGGCTTTCTGGGACTGGCCCGGCTC    |
| pCDNA-3xFLAG-hSOX17                   | AACGGATCCATGAGCAGCCGGATGCGGGATAC | TAGCGAATTCTCACACGTGAGATAGTTGCAGTA |
| pCDNA-3xFLAG-hSOX17 <sup>AE-L</sup>   | GACCGCACGTTCTGTGCAAGCCTGAGAT     | GCACACGAACGTGCGGTCCACCTCCCCGA     |

**Table S3.** Primers used for the generation of plasmids encoding GAL4<sup>DBD</sup>/SOXE fusion proteins

| Plasmid name                      | Forward primer                      | Reverse primer                       |
|-----------------------------------|-------------------------------------|--------------------------------------|
| pBind-hSOX9 <sup>TAM</sup>        | CGGGATCCGTCCCGGCGAGCACTCGGGGCAA     | CGGAGATCTCACGGCACCCCGGGTGGCCGT       |
| pBind-hSOX9 <sup>TAC</sup>        | CGGGATCCGTCAAGTCCAGCGAACGCACATCA    | CGGAGATCTCAAGGTCGAGTGAAGCTGTGTGA     |
| pBind-hSOX9 <sup>TAM&gt;TAC</sup> | CGGGATCCGTCCCGGCGAGCACTCGGGGCAA     | CGGAGATCTCAAGGTCGAGTGAAGCTGTGTGA     |
| pBind-hSOX9 <sup>PQA</sup>        | ATGGGATCCAGCAGGCCCGCCGCCA           | CGGTCTAGATCACAGCGTGGTCAAGCTGTGCGCCTG |
| pBind-hSOX9 <sup>TAM-AB</sup>     | CGGGATCCGTCCCGGCGAGCACTCGGGGCAA     | CGGAGATCTCAGGGCTGTCTGCCCCCTCTGG      |
| pBind-hSOX9 <sup>TAM-CD</sup>     | CGGGATCCGTCTATCGACTTCCGCGACGTG      | CGGAGATCTCACGGCACCCCGGGTGGCCGT       |
| pBind-hSOX9 <sup>TAM-C</sup>      | CGGGATCCGTCTATCGACTTCCGCGACGTG      | CGGTCTAGATCAGGTCTCGATGTTGGAGATGAC    |
| pBind-hSOX9 <sup>TAM-D</sup>      | CGGGATCCGTAACATCGAGACCTTCGATGTCAACG | CGGTCTAGATCACGGCACCCCGGGTGGCCGT      |

|                                    |                                  |                                     |
|------------------------------------|----------------------------------|-------------------------------------|
| pBind-hSOX8 <sup>TAM</sup>         | CGGGATCCGTCATGCGA CCACACAGGGCAG  | CGGTCTAGATCACTCGGGTGGGGCGGGGCCG     |
| pBind-hSOX8 <sup>TAC</sup>         | CGGGATCCGTTGGTCCCCACGGCCGCACATC  | CGGTCTAGATCAGGGCCTGGTCAGGGTGGT      |
| pBind-hSOX8 <sup>TAM&gt;TAC</sup>  | CGGGATCCGTCATGGCGACCACACAGGGCAG  | CGGTCTAGATCAGGGCCTGGTCAGGGTGGT      |
| pBind-hSOX10 <sup>TAM</sup>        | CGGGATCCGTCGCCGAGCACCCCTCAGGCCAG | CGGTCTAGATCACACATGGCCTGGGTGCCATTG   |
| pBind-hSOX10 <sup>TAC</sup>        | CGGGATCCGTTGGATGCCAAAGCCAGGTG    | CGGTCTAGATCAGGGCCGGGACAGTGTCTATATAC |
| pBind-hSOX10 <sup>TAM&gt;TAC</sup> | CGGGATCCGTCGCCGAGCACCCCTCAGGCCAG | CGGTCTAGATCAGGGCCGGGACAGTGTCTATATAC |

**Table S4.** Primers used to generate plasmids encoding SOX9 and GAL4<sup>DBD</sup>/SOX9 proteins with missense variants. Wild-type sequences are shown as references. Wild-type and variant codons are shown in blue and red, respectively, and mutations in bold letters.

| Variant            | Forward primer                                                                                         | Reverse primer                                                                                     |
|--------------------|--------------------------------------------------------------------------------------------------------|----------------------------------------------------------------------------------------------------|
| Wild-type<br>G276S | TGGACATC <b>GGC</b> GAGCTGAGCAGCGAC<br>TGGACATC <b>AGC</b> GAGCTGAGCAGCGAC                             | TCAGCTC <b>GCC</b> GATGTCCACGTCCGG<br>TCAGCTC <b>GCT</b> GATGTCCACGTCCGG                           |
| Wild-type<br>E277A | ACATCGGC <b>GAG</b> CTGAGCAGCGACGTCATC<br>ACATCGGC <b>GCC</b> CTGAGCAGCGACGTCATC                       | TCGCTGCTCAG <b>CTC</b> GCCGATGTCCACG<br>TCGCTGCTCAG <b>GGC</b> GCCGATGTCCACG                       |
| Wild-type<br>L278S | ACATCGGC <b>GAG</b> <b>CTG</b> AGCAGCGACGTCATCTCC<br>ACATCGGC <b>GAG</b> <b>AGC</b> AGCAGCGACGTCATCTCC | CGTCGCTGCT <b>CAG</b> CTCGCCGATGTCCACG<br>CGTCGCTGCT <b>GCT</b> CTCGCCGATGTCCACG                   |
| Wild-type<br>L278F | ACATCGGC <b>GAG</b> <b>CTG</b> AGCAGCGACGTCATC<br>ACATCGGC <b>GAG</b> <b>TTT</b> AGCAGCGACGTCATC       | CGTCGCTGCT <b>CAG</b> CTCGCCGATGTCCACG<br>CGTCGCTGCT <b>AAA</b> CTCGCCGATGTCCACG                   |
| Wild-type<br>D281A | TGAGCAGC <b>GAC</b> GTCATCTCCAACATCGAG<br>TGAGCAGC <b>GCC</b> GTCATCTCCAACATCGAG                       | GAGATGAC <b>GTC</b> GCTGCTCAGCTCCG<br>GAGATGAC <b>GGC</b> GCTGCTCAGCTCCG                           |
| Wild-type<br>D281Y | TGAGCAGC <b>GAC</b> GTCATCTCCAACATCGAG<br>TGAGCAGC <b>TAC</b> GTCATCTCCAACATCGAG                       | CTCGATGTTGGAGATGAC <b>GTC</b> GCTGCTCAG<br>CTCGATGTTGGAGATGAC <b>GTA</b> GCTGCTCAG                 |
| Wild-type<br>D281L | AGCTGAGCAGC <b>GAC</b> GTCATCTCCAACATCG<br>AGCTGAGCAGC <b>CTC</b> GTCATCTCCAACATCG                     | TGGAGATGAC <b>GTC</b> GCTGCTCAGCTCG<br>TGGAGATGAC <b>GAG</b> GCTGCTCAGCTCG                         |
| Wild-type<br>V282D | TGAGCAGCGAC <b>GTC</b> ATCTCCAACATCGAG<br>TGAGCAGCGAC <b>GAC</b> ATCTCCAACATCGAG                       | CTCGATGTTGGAGAT <b>GAC</b> GTCGCTGCTCAG<br>CTCGATGTTGGAGAT <b>GTC</b> GTCGCTGCTCAG                 |
| Wild-type<br>I283F | TGAGCAGCGAC <b>GTC</b> <b>ATC</b> TCCAACATCGAG<br>TGAGCAGCGAC <b>GACTTC</b> TCCAACATCGAG               | CTCGATGTTGGAGAT <b>GAC</b> GTCGCTGCTCAG<br>CTCGATGTTGGAGAT <b>GTC</b> GTCGCTGCTCAG                 |
| Wild-type<br>S284F | TGAGCAGCGAC <b>GTC</b> ATCT <b>TCC</b> AACATCGAG<br>TGAGCAGCGAC <b>GAC</b> ATCT <b>TTC</b> AACATCGAG   | CTCGATGTTGGAGAT <b>GAC</b> GTCGCTGCTCAG<br>CTCGATGTTGGAGAT <b>GTC</b> GTCGCTGCTCAG                 |
| Wild-type<br>D290A | AGACCTTC <b>GAT</b> GTC AACGAGTTTGACCAG<br>AGACCTTC <b>GCT</b> GTC AACGAGTTTGACCAG                     | TCGTTGAC <b>ATC</b> GAAAGGTCTCGATGTTG<br>TCGTTGAC <b>AGC</b> GAAAGGTCTCGATGTTG                     |
| Wild-type<br>E293G | GAGACCTTCGATGTCAAC <b>GAG</b> TTTGACCAGTACCTGCC<br>GAGACCTTCGATGTCAAC <b>AGG</b> TTTGACCAGTACCTGCC     | GGCAGGTACTGGTCAAA <b>CTC</b> GTTGACATCGAAGGTCTC<br>GGCAGGTACTGGTCAAA <b>CAT</b> GTTGACATCGAAGGTCTC |
| Wild-type<br>E293K | GAGACCTTCGATGTCAAC <b>GAG</b> TTTGACCAGTACCTGCC<br>GAGACCTTCGATGTCAAC <b>AAG</b> TTTGACCAGTACCTGCC     | GGCAGGTACTGGTCAAA <b>CTC</b> GTTGACATCGAAGGTCTC<br>GGCAGGTACTGGTCAAA <b>CAT</b> GTTGACATCGAAGGTCTC |

|                    |                                                                                                    |                                                                                                    |
|--------------------|----------------------------------------------------------------------------------------------------|----------------------------------------------------------------------------------------------------|
| Wild-type<br>E293M | GAGACCTTCGATGTCAAC <u>GAG</u> TTTGACCAGTACCTGCC<br>GAGACCTTCGATGTCAAC <u>ATG</u> TTTGACCAGTACCTGCC | GGCAGGTACTGGTCAAA <u>CTC</u> GTTGACATCGAAGGTCTC<br>GGCAGGTACTGGTCAAA <u>CAT</u> GTTGACATCGAAGGTCTC |
| Wild-type<br>E293T | GAGACCTTCGATGTCAAC <u>GAG</u> TTTGACCAGTACCTGCC<br>GAGACCTTCGATGTCAAC <u>ACG</u> TTTGACCAGTACCTGCC | GGCAGGTACTGGTCAAA <u>CTC</u> GTTGACATCGAAGGTCTC<br>GGCAGGTACTGGTCAAA <u>CGT</u> GTTGACATCGAAGGTCTC |
| Wild-type<br>F294L | ATGTCAACGAG <u>TTT</u> GACCAGTACCTGCCGCC<br>ATGTCAACGAG <u>CTG</u> GACCAGTACCTGCCGCC               | AGGTACTGGTC <u>AAA</u> CTCGTTGACATCGAAGG<br>AGGTACTGGTC <u>CAG</u> CTCGTTGACATCGAAGG               |
| Wild-type<br>F294S | ATGTCAACGAG <u>TTT</u> GACCAGTACCTGCCGCC<br>ATGTCAACGAG <u>TCT</u> GACCAGTACCTGCCGCC               | AGGTACTGGTC <u>AAA</u> CTCGTTGACATCGAAGG<br>AGGTACTGGTC <u>AGA</u> CTCGTTGACATCGAAGG               |
| Wild-type<br>D295Y | ATGTCAACGAGTTT <u>GAC</u> CAGTACCTGCCGCC<br>ATGTCAACGAGTCT <u>TAC</u> CAGTACCTGCCGCC               | AGGTACTGGTC <u>AAA</u> CTCGTTGACATCGAAGG<br>AGGTACTGGTC <u>AGA</u> CTCGTTGACATCGAAGG               |
| Wild-type<br>Q296R | AGTTTGAC <u>CAG</u> TACGATCCGCCAAC<br>AGTTTGAC <u>CGT</u> TACGATCCGCCAAC                           | TTGGCGGATCGT <u>ACT</u> GTCAAACCTCG<br>TTGGCGGATCGT <u>ACG</u> GTCAAACCTCG                         |
| Wild-type<br>Y297A | AGTTTGACCAG <u>TAC</u> CTGCCGCC<br>AGTTTGACCAG <u>GCC</u> CTGCCGCC                                 | TGGCGGCAG <u>GTA</u> CTGGTCAAAC<br>TGGCGGCAG <u>GGC</u> CTGGTCAAAC                                 |
| Wild-type<br>Y297S | AGTTTGACCAG <u>TAC</u> CTGCCGCC<br>AGTTTGACCAG <u>TCC</u> CTGCCGCC                                 | TGGCGGCAG <u>GTA</u> CTGGTCAAAC<br>TGGCGGCAG <u>GGA</u> CTGGTCAAAC                                 |
| Wild-type<br>Y297D | AGTTTGACCAG <u>TAC</u> CTGCCGCC<br>AGTTTGACCAG <u>GAT</u> CTGCCGCC                                 | TGGCGGCAG <u>GTA</u> CTGGTCAAAC<br>TGGCGGCAG <u>ATC</u> CTGGTCAAAC                                 |
| Wild-type<br>Y297L | AGTTTGACCAG <u>TAC</u> CTGCCGCCAACG<br>AGTTTGACCAG <u>TG</u> CTGCCGCCAACG                          | TGGCGGCAG <u>GTA</u> CTGGTCAAACCTCGTTG<br>TGGCGGCAG <u>CA</u> CTGGTCAAACCTCGTTG                    |
| Wild-type<br>Y297F | AGTTTGACCAG <u>TAC</u> CTGCCGCCAACG<br>AGTTTGACCAG <u>TC</u> CTGCCGCCAACG                          | TGGCGGCAG <u>GTA</u> CTGGTCAAACCTCGTTG<br>TGGCGGCAG <u>GAA</u> CTGGTCAAACCTCGTTG                   |
| Wild-type<br>L298D | AGTTTGACCAGTAC <u>CTG</u> CCGCCAAC<br>AGTTTGACCAGTAC <u>GAT</u> CCGCCAAC                           | GTTGGCGGCAG <u>CAG</u> TACTGGTCAAAC<br>GTTGGCGGCAG <u>ATC</u> TACTGGTCAAAC                         |

**Table S5.** Primers used for mRNA expression analysis by qRT-PCR

| Gene          | Forward primer          | Reverse primer         |
|---------------|-------------------------|------------------------|
| <i>Acan</i>   | GATCTACCGCTGTGAAGTGATG  | GGGTGTAGCGTGTGGAAATAG  |
| <i>Col2a1</i> | ACATAGGCCTGTCTGCTTCTTGT | TGACTGCGGTTGGAAAGTGTGG |
| <i>Hprt</i>   | CCTCATGGACTGATTATGGACAG | TCAGCAAAGAACTTATAGCCCC |



**A**

|            | PQA domain |    |     |    |      |      |      |      |      |      |      |      |      |      |      |      |      |      |     |     |
|------------|------------|----|-----|----|------|------|------|------|------|------|------|------|------|------|------|------|------|------|-----|-----|
| Human      | MSK        | QQ | APP | PP | PP   | QQ   | PP   | QAP  | ---- | PAP  | QAP  | PP   | QAA  | PP   | QQA  | PP   | QQ   | PP   | QA  | HTL |
| Mouse      | MSK        | QQ | APP | PP | PP   | QQ   | PP   | QAP  | ---- | QAP  | QAP  | PP   | QAP  | PP   | Q    | PP   | QQ   | QA   | HTL |     |
| Dog        | MSK        | QQ | APP | PP | PP   | PP   | PP   | QQ   | SP   | QAP  | PP   | QAP  | PP   | QAP  | PP   | QAP  | PP   | QAA  | HTL |     |
| Platypus   | LSK        | QQ | QQ  | QQ | QQ   | QQ   | PP   | PP   | QQ   | ---- | SP   | QQ   | QQ   | QQ   | QQ   | PP   | PP   | QQ   | QA  | HPT |
| Chicken    | MAK        | QQ | PP  | PP | PP   | QAP  | PP   | QA   | ---- | ---- | ---- | ---- | ---- | ---- | ---- | ---- | ---- | ---- | HTL |     |
| Alligator  | MAK        | QQ | PP  | PP | PP   | QAP  | PP   | QA   | ---- | ---- | ---- | ---- | ---- | ---- | ---- | ---- | ---- | ---- | HTL |     |
| Frog       | MSK        | QQ | QQ  | QQ | QQ   | PP   | PP   | Q    | ---- | ---- | ---- | ---- | ---- | ---- | ---- | ---- | ---- | ---- | HSL |     |
| Coelacanth | ISK        | QQ | QQ  | Q  | ---- | ---- | ---- | ---- | ---- | ---- | ---- | ---- | ---- | ---- | ---- | ---- | ---- | ---- | HSI |     |
| Zebrafish  | MTK        | P  | Q   | N  | G    | S    | P    | Q    | S    | S    | Q    | ---- | ---- | ---- | ---- | ---- | ---- | ---- | -L  |     |
| Lamprey    | LSK        | QQ | QQ  | QQ | QQ   | QQ   | QQ   | Q    | ---- | ---- | ---- | ---- | ---- | ---- | ---- | ---- | ---- | ---- | HTL |     |

**B**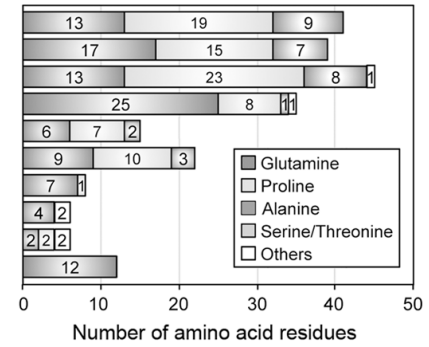**C****Human (*Homo sapiens*)**

MNLLDPFMKMTDEQEKGLSGAPSPMTSEDSAGSPSPSGSDTENTRQENTFPKGEPLKKESEEDKFPVCIREAVSQVLKGYDWTLVMPVVRVNGSSKNK  
 PHVKRPMNAFMVWAQAARRKLDQYPHLHNAELSKTLGKLRLLNESEKRPFVEEAERLRVQHKKDHPDYKYQPRRRKSVKNGQAEAEAEETEQTHTISPNAIF  
 KALQADSPHSSSGMSEVHSPGEHSGSQSQGPPPTTPKTDVQPGKADLKRGRPLPEGGRRQPPIDFRDVIDIGELSSDVISNIETFDVNEFDQYLPNPNHGPV  
 PATHGQVITYTGSYGISSTAAPTASAGHVWMSKQQAPPFPQQPPQAPPAPQAPPPQQAAPPQQAAPPQQAHTLTTLSSEPGQSQRTHIKTEQLSPSHYS  
 EQQHQSPQIAYSFNLPHYSYSPPIITRSQYDYTDHQNSSSYSHAAGQGTGLYSTFTYMNPAQRPMYTPIDTSGVPSIPQTHSQHWEPVYVYQLTRP

**Sea urchin (*Lytechinus variegatus*)**

MSSPESLELHHSLESGSPRTPGSDSDSSSECSREDLAILPGRVDPALVVGHEGAATQFSPSIKDAVSRVNLNGYDWSVVAIPTRTGPNGKRKPHIKRPMN  
 AFMVWAQAARRKLNQYQLHNAELSKTLGKLRLLSDKEKQPFIEEAERLRQHKKDYPDYKYQPRRRKNKDNNSNTKKCPNNRSLTVPSPDSSNHVSTK  
 ALLSAMVGEETIANKKERTEKLGMMGGAGGQPPPTTPKNDLDCRPNKRQKYSKLVKTEMPVDFAGVDVDFGGDIMGMEFSEELDQYIVQTIAS  
 VTASQPMPCQQGMVRQTCAMPFFTTHSSYPMSNVNTQSSNGRQWGGRRHHPGSGNTSPLQATVLDNVNSKLEHDMMSPPQYPSQQQLHQMQAFHFAAMQQA  
 QEQPPQQPYDFRQSQCEYPAQQHSPQQQAQMDFYANAGATPVQNMPPAYQYPHSTPQRSPAYVDLTPATMIPESRPWDSFAGTVRS

**Velvet worm (*Euperipatoides kanangrensis*)**

GYDWTLVPLPTRQNGSEKRRPHVKRPMNAFMVWAQAARRKLDQYPHLHNAELSKTLGKLRLLNDDEKPKFIEEAERLRVVKHKEHPDYKYQPRRRKPLKG  
 AANSSDLVGQSSPTVIFRTLKQIENSASQDSESSVISAKTSPSGSTHGPPPTTPNHQDRLSGKESCLKMSHNSRTGRNETAPPIDFSDIDIGQLSSD  
 VLNPIENFDESLELDQYLPNPNQGLSRDHPYSVNYSSISVPTTATAPSWMSKYCLATVVSSTYVPSVNTNNDKCSQNMNDYSSSTYHTTDESRLFELQF  
 SPSVKLEHLPSRQHSSSQDNFAQSRLLQHHYSGSNYSSNQAMMPSYTCMMASRGTIFPS

**Common fruit fly (*Drosophila melanogaster*)**

MSDSSSNCSKDRKPVETLVLANVALKAEQKKAQGGGRKEDERITTAVMKVLEGYDWNLVQASAKAPTDRKKEHIKRPMAFMVWAQAARRVMSKQYPHL  
 QNSELSKSLGKLRLLNDSDKPKFMEFAEKLRMTHKQEHDPDYKYQPRRRKARVLPSSQSGEGGSPGPEMTLSATMGSSGKPRSSNSNGQRAGKGNAAADLG  
 SCASTISHANVGSNSDVFSNEAFMKSLSNACAASLMEQLIETGLDSPCSTASSMSSLTPPATPYNVAPSNKASANNPSSLRLQSEPVANAGDGYGLV  
 LEAGREYVAIGEYVYQGSAGVQSGAEGGGAGQEMDFLENIYGGYTSRVSYPAYSYPANGGHFATEEQQQQALQASEALNYKPAAADIDPKLEIDQYFM  
 DQMLPMTQHHPHHTHPLHHPPLNSSASLSACSASSQQPVAEYIEHLGYSAPASSASQNPFPQPPYANGAASMTPTLGDPPAPQQLQSQQQEQ  
 QHQNPQHLLWGTYYVNVN

**Starlet sea anemone (*Nematostella vectensis*)**

MDKKVTEQQVAVLGLDQVNRNHQLSNAIASAVNHVLDGYDWSLIPLVRVNGIKTKQPHVKRPMNAFMVWAQAVRRKLDQYPHLHNAELSKTLGKLR  
 KLLNDSEKPKFIEEAERLRVVKHKEHPDYKYQPRRRKQKGNNGDAGDATISADLLKVLKGDVSKLVPNNGDASASCASPEVSDGEVSSSECSVSPETP  
 TAVPVKNEDVKNDEALSAQPGFPSCSKKDDNSHAI DFDVGLTDLAMGVDVSEFDQYLPYTSQALLDSTLTKAINTQINTQSLNSRFTTSQAVQSP  
 PPLPSSYREFMVQLKLPSEGSFPNRPVAPSATMQQRNQDNSFFPSESEVNVCSLAAATRQPAFLSSPSTSGTLSSSSNSGRHTHTLIWK

Color code: HMG domain, EΦDQYΦ motif, PQA domain &amp; flanking residues, TAC domain

**D**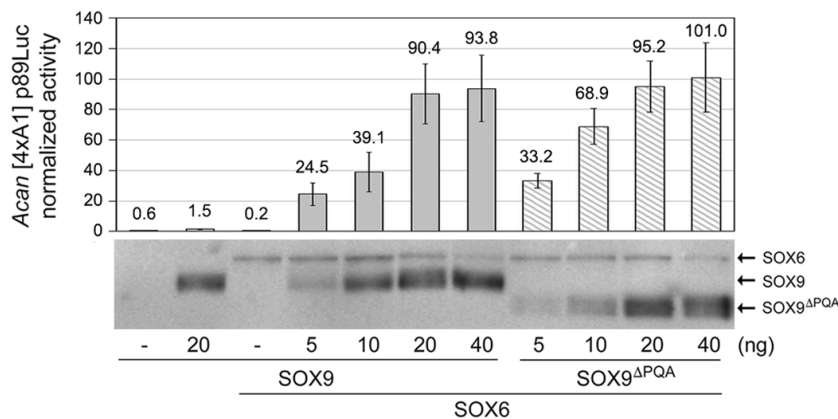

**Figure S2.** Analysis the SOX9 PQA domain. **(A)** ClustalW alignment of the PQA domains (boxed) and flanking residues in SOX9 orthologs from representative species in the vertebrate subphylum: human (*Homo sapiens*), mouse (*Mus musculus*), dog (*Canis lupus familiaris*), platypus (*Ornithorhynchus anatinus*), chicken (*Gallus gallus*), American alligator (*Alligator mississippiensis*), African clawed frog (*Xenopus laevis*), coelacanth (*Latimeria chalumnae*), zebrafish (*Danio rerio*; the protein encoded by *sox9a* was used), and lamprey (SOXE3; *Petromyzon marinus*). **(B)** Length of the PQA domains shown in panel A and numbers of specific residues. **(C)** Comparison of human SOX9 and invertebrate SOXE sequences. Protein domains are colored, as indicated. P, Q, and A residues are bolded in human SOX9 PQA and in invertebrate SOXE segments that were aligned with human SOX9 PQA by the ClustalW tool. **(D)** Test of the ability of SOX9 lacking PQA to transactivate an *Acan* [4xA1]-p89Luc reporter in synergy with SOX6. The reporter contains 4 copies of a cartilage-specific *Acan* enhancer (A1) upstream of a *Col2a1* minimal promoter and the firefly luciferase gene. SW-1353 cells were transfected with the reporter, a control plasmid to assess transfection efficiency, a SOX6 or empty expression plasmid, and increasing amounts of SOX9 or SOX $\Delta$ PQA plasmid, as indicated. The western blot of cell lysates shows that deletion of PQA did not affect the production or stability of the SOX9 protein.

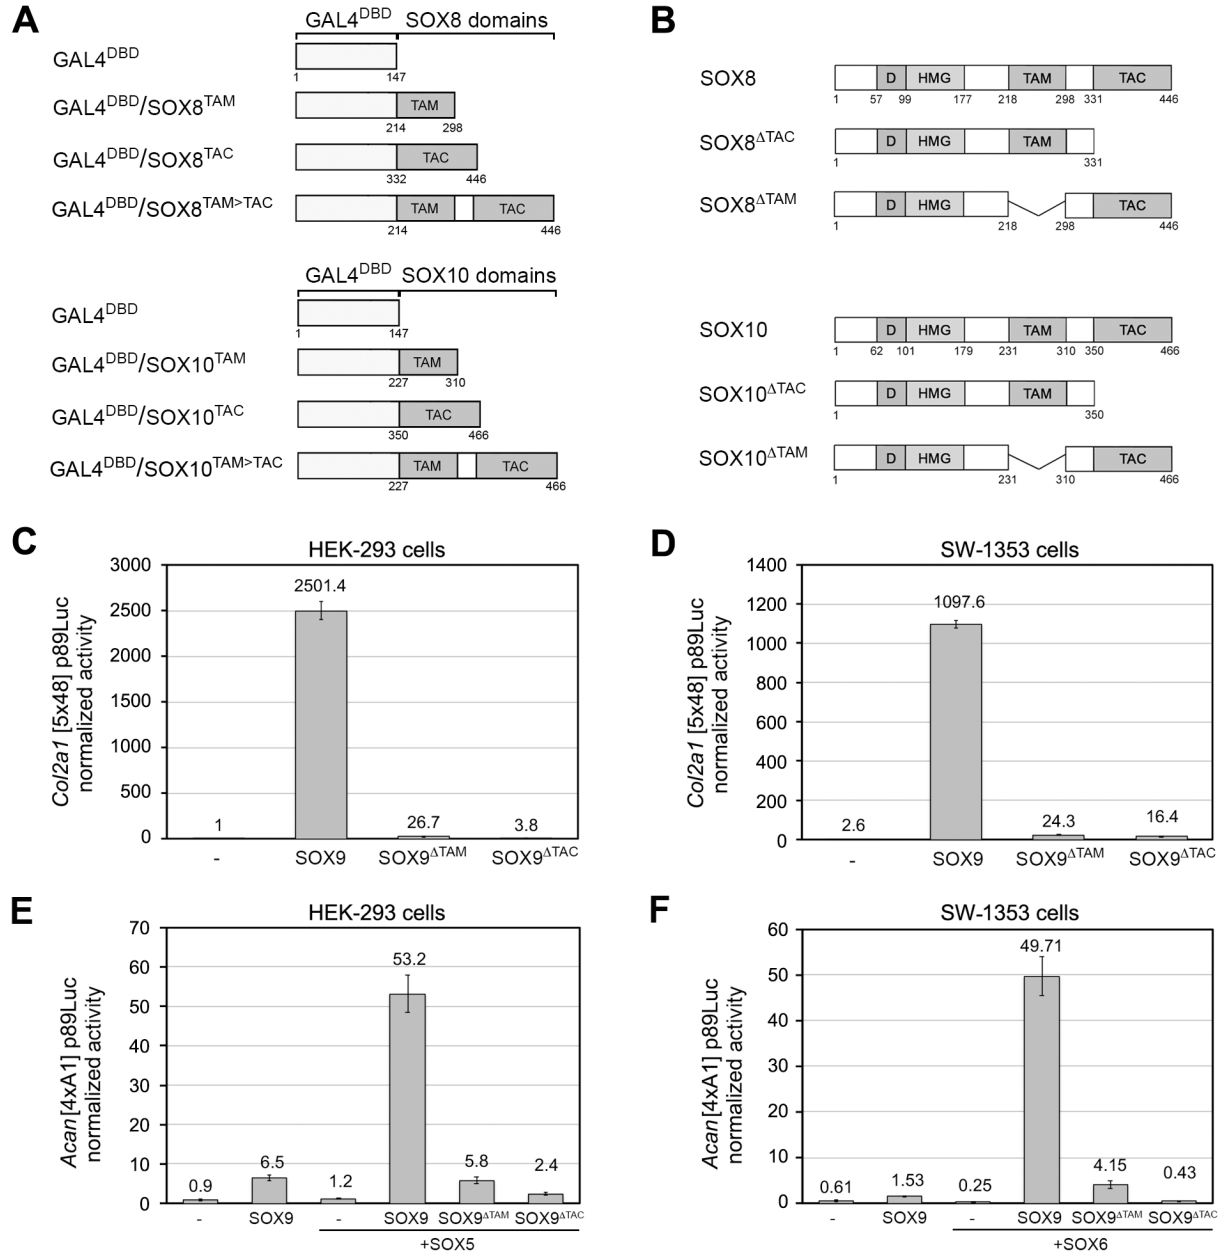

**Figure S3.** Analysis of the activities of SOXE TAM and TAC domains in transactivation. **(A)** Schematics showing fusion proteins of GAL4<sup>DBD</sup> and the TAM, TAC and TAM-to-TAC domains of SOX8 and SOX10 used in Figure 3B and C. **(B)** Schematics of SOX8 and SOX10 wild-type proteins and deletion mutants lacking TAM or TAC used in Figure 3D and E. **(C to F)** Test of the ability of SOX9 deletion mutants to activate a *Col2a1* or *Acan* reporter in HEK-293 and SW-1353 cells. The SOX9 expression plasmids encoded the proteins shown in Figure 3D. The data presented in panel C are the same as in the middle panel of Figure 3E. They are shown to facilitate their comparison to those shown in panels D to F. Activation of the *Acan* reporter was tested in the presence of an expression plasmid for SOX5 or SOX6 (panels E and F).



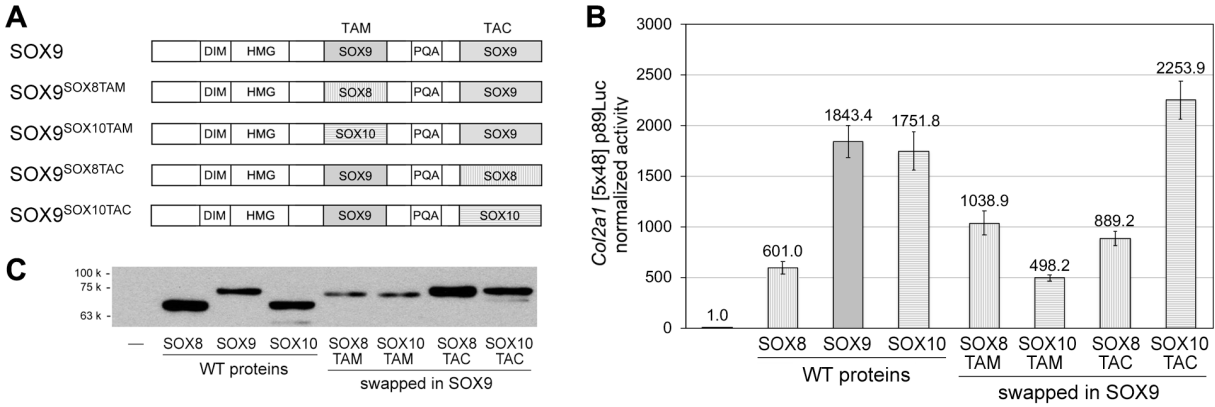

**Figure S4.** Effect of swapping SOX9<sup>TAM</sup> and SOX9<sup>TAC</sup> with the corresponding SOX8 and SOX10 domains on SOX9 activity. **(A)** Schematics of the SOX9 wild-type protein and proteins in which the TAM or TAC domain of SOX9 was exchanged with the equivalent domain from SOX8 or SOX10. **(B)** Reporter assay comparing the abilities of the wild-type SOXE proteins and SOX9 chimeric proteins to activate the *Col2a1* reporter in HEK-293 cells. Reporter activities are presented as the mean  $\pm$  standard deviation obtained for triplicate cultures per condition. Data were normalized for transfection efficiency and are reported as fold increase relative to the activity of the reporter in the presence of empty expression plasmids. These results were reproduced in multiple experiments. **(C)** Western blot showing the relative amounts of SOX proteins present in the cells at the end of the culture period. The blots were made with lysate amounts normalized for transfection efficiency. Note that differences in the relative amounts of proteins may contribute to explain the lower activities of the SOX9 proteins harboring the SOX8 and SOX10 TAM domains compared to wild-type SOX9, but not the difference in activities between these two mutants.

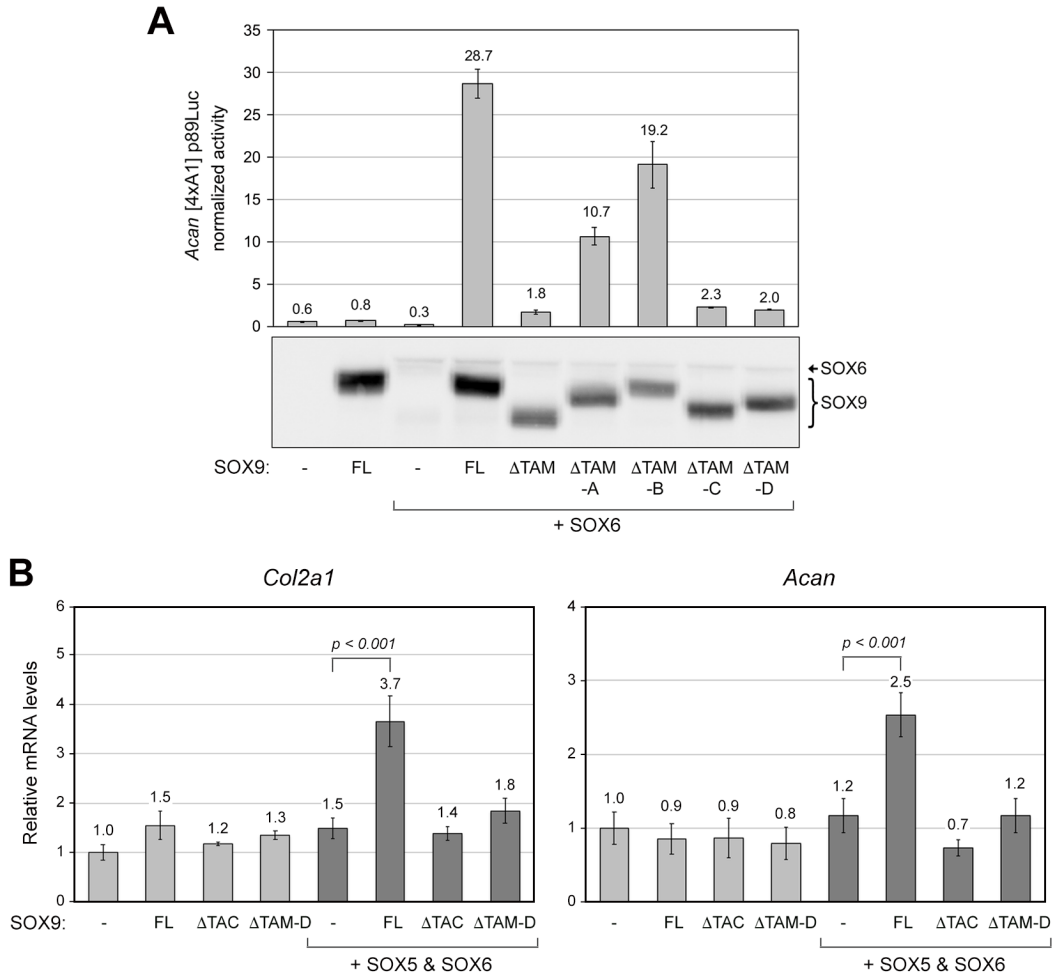

**Figure S5.** Importance of TAM subdomains for SOX9 transactivation. **(A)** HEK-293 cells were transiently transfected with the *Acan* reporter and with expression plasmids encoding no SOX protein (-), wild-type SOX9 (FL), SOX9 deletion mutants (schematized in Figure 3D), and SOX6, as indicated. Reporter activities are presented for a representative experiment as described in other figures. The western blot of cell lysates shows that the lower activities of the SOX9 proteins lacking TAM-A and TAM-B may be explained at least in part by lower amounts of these proteins compared to wild-type SOX9. **(B)** Importance of TAC and TAM-D in SOX9 transactivation of the endogenous *Col2a1* and *Acan* genes. ATDC5 cells were transiently transfected with expression plasmids for no SOX protein (-), wild-type SOX9 (FL), SOX9 lacking TAC ( $\Delta$ TAC) or SOX9 lacking TAM-D ( $\Delta$ TAM-D), and SOX5 and SOX6. The relative levels of *Col2a1* and *Acan* mRNA, as assessed by qRT-PCR 24 h after the start of transfection, are presented as fold increases over the levels present in cells transfected with the empty expression plasmid. Each value is presented as the mean  $\pm$  standard deviation obtained for four cell culture replicates generated in two separate experiments. The Student's T-test was used to assess the statistical significance of differences in mRNA levels among all conditions. The only differences that reached a high degree of significance ( $p < 0.05$ ) are indicated. The actual  $p$  value for these differences was  $< 0.001$ .



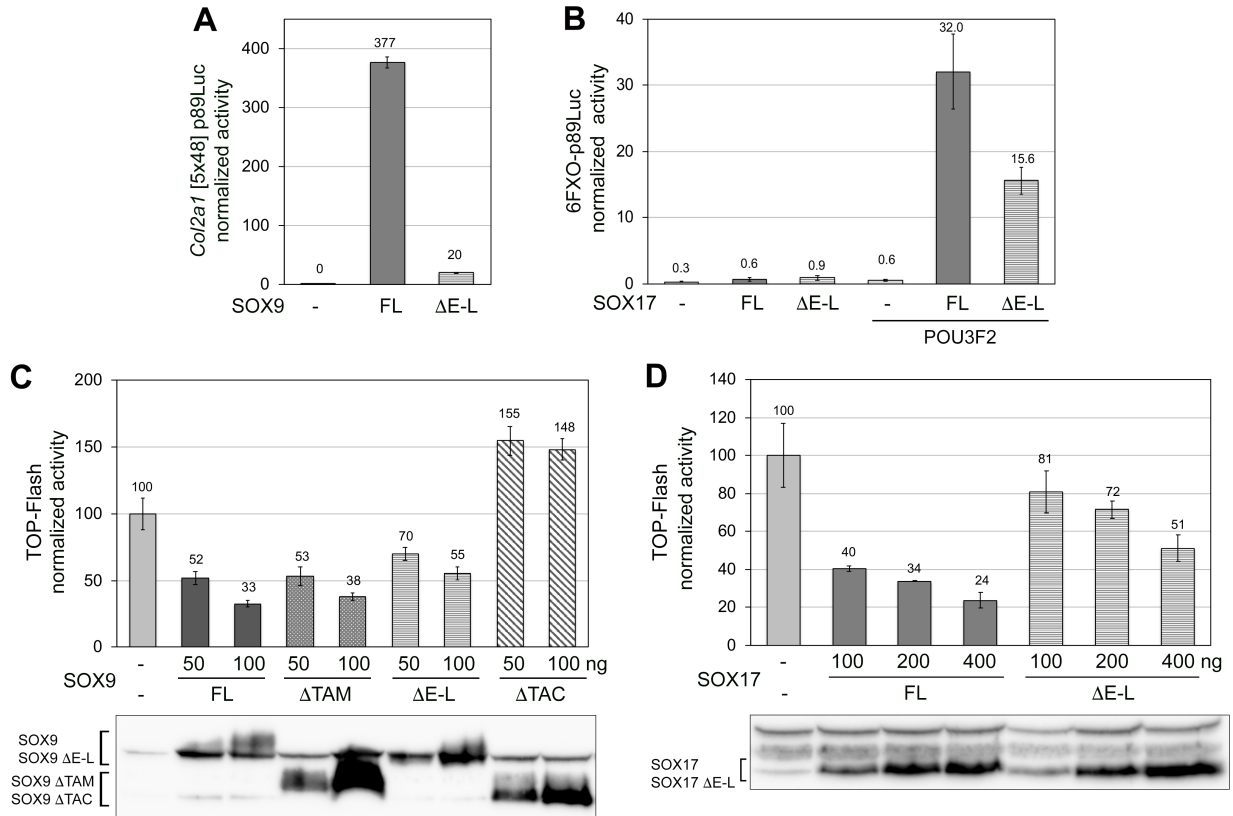

**Figure S7.** Importance of the EΦ[D/E]QYΦ motif in SOX9 and SOX17 activities. **(A)** HEK-293 cells were transfected with the *Col2a1* reporter and with expression plasmids for no SOX protein (-), wild-type SOX9 (FL), or SOX9 lacking the EFDQYL motif (ΔE-L). Reporter activities are presented for a representative experiment as described in other figures. **(B)** HEK-293 cells were transfected with a *6FXO-p89Luc* reporter and with plasmids encoding no protein (-), wild-type SOX17 (FL), SOX17 lacking the EFEQYL motif (ΔE-L), or POU3F2. The *6FXO-p89Luc* reporter contains 6 copies of an *Fgf4* enhancer featuring adjacent binding sites for SOX and POU-domain proteins. Reporter activities are presented for a representative experiment as described in other figures. **(C)** HEK-293 cells were transfected with the TopFlash reporter, a plasmid encoding constitutively stabilized β-catenin, and plasmids encoding no protein, wild-type SOX9 or SOX9 lacking TAM, EFDQYL or TAC. SOX9 plasmids were tested at 50 and 100 ng. Reporter activities are presented in percentages of the activity of β-catenin in the absence of SOX protein. Values are the mean ± standard deviation obtained for triplicate cultures in one experiment representative of three independent ones. The western blot shows that all SOX9 proteins were made and that the slightly stronger ability of SOX9<sup>ΔTAM</sup> than SOX9<sup>ΔE-L</sup> to inhibit β-catenin is likely due to its larger amount. **(D)** HEK-293 cells were transfected with the TOP-Flash reporter, an expression plasmid for constitutively stabilized β-catenin, and expression plasmids for no SOX protein (-), wild-type SOX17 (FL) or SOX17 lacking EFEQYL. The SOX17 plasmids were tested at 100, 200 and 400 ng. Reporter activities are presented as in panel C. The western blot shows that the SOX17 wild-type and mutant proteins were made in similar amounts and thus that the weaker ability of the mutant to inhibit β-catenin is genuinely due to the EFEQYL deletion.

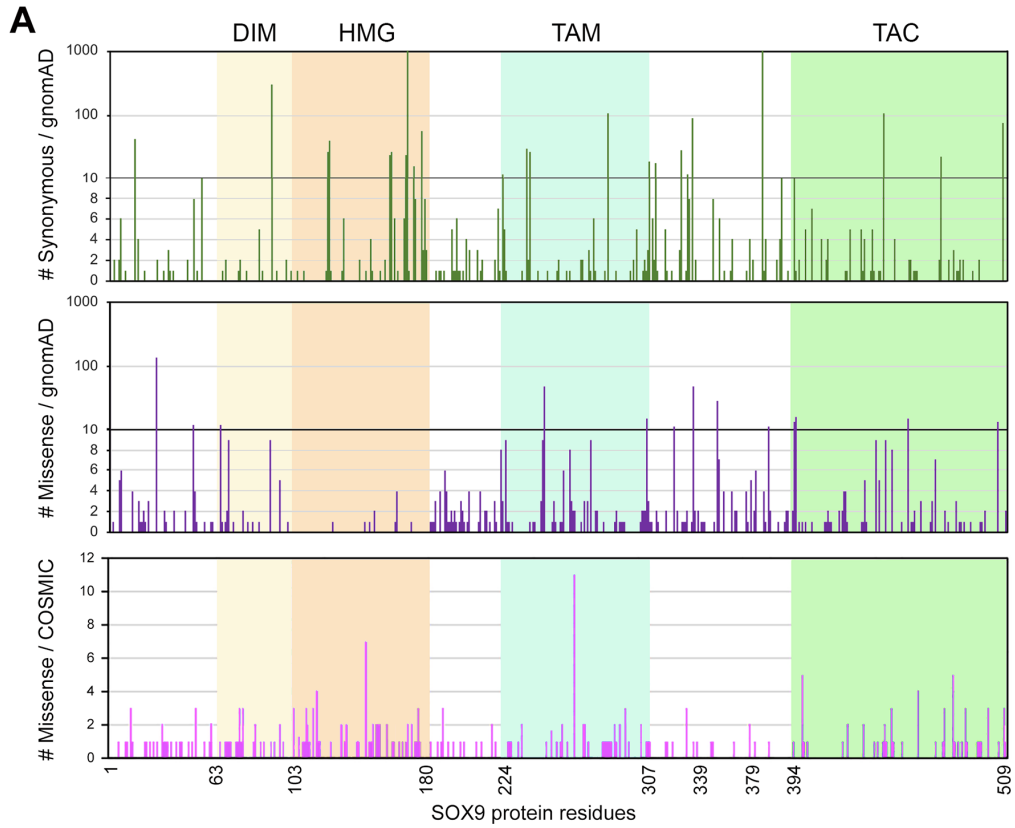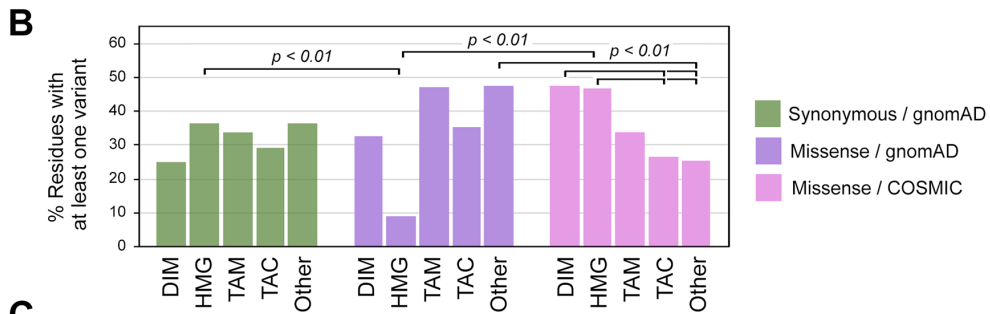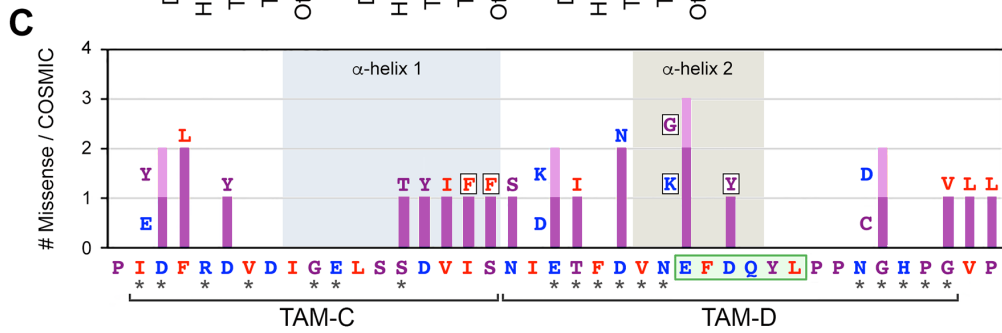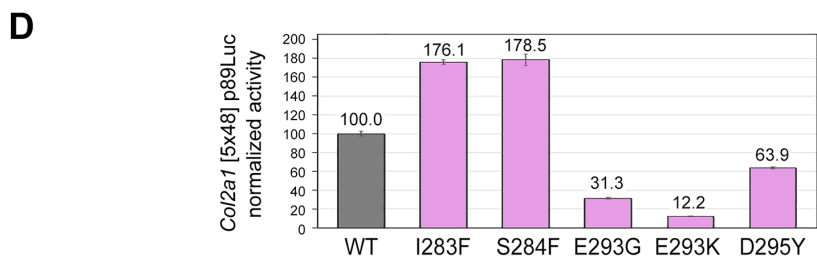

**Figure S8.** Analysis of missense variants detected in SOX9 in control individuals and in cancer samples and effect of missense variants reported in cancers on the transcriptional activity of SOX9. **(A)** Bar graphs showing the numbers of synonymous variants (top) and missense variants (middle) reported in control individuals in the gnomAD database, and missense variants reported in cancers in the COSMIC database (bottom) throughout the human SOX9 protein. **(B)** Percentages of residues with at least one variant in each SOX9 domain. “Other” refers to the SOX9 sequences outside the known functional domains. This graph used the same data as in panel A. Statistically significant differences between datasets were calculated using the Student’s T test. Brackets link data for which the p value was < 0.01. **(C)** Numbers and types of missense variants reported for the SOX9 TAM-CD region in COSMIC. The five variants tested in panel D are boxed. Stars mark residues that have missense variants in the gnomAD cohort. **(D)** *Col2a1* reporter activities achieved in HEK-293 cells by SOX9 proteins harboring a subset of COSMIC missense variants. Values are presented as percentages of the activities measured for wild-type SOX9. Each value is the mean  $\pm$  standard deviation obtained for triplicate cultures in one representative experiment. Similar results were obtained in multiple experiments.

## SUPPLEMENTARY REFERENCES

1. Kamachi, Y., Cheah, K.S. and Kondoh, H. (1999) Mechanism of regulatory target selection by the SOX high-mobility-group domain proteins as revealed by comparison of SOX1/2/3 and SOX9. *Mol Cell Biol*, **19**, 107-120.
2. Nowling, T.K., Johnson, L.R., Wiebe, M.S. and Rizzino, A. (2000) Identification of the transactivation domain of the transcription factor Sox-2 and an associated co-activator. *J Biol Chem*, **275**, 3810-3818.
3. Xia, Y., Papalopulu, N., Vogt, P.K. and Li, J. (2000) The oncogenic potential of the high mobility group box protein Sox3. *Cancer Res*, **60**, 6303-6306.
4. Dy, P., Penzo-Mendez, A., Wang, H., Pedraza, C.E., Macklin, W.B. and Lefebvre, V. (2008) The three SoxC proteins--Sox4, Sox11 and Sox12--exhibit overlapping expression patterns and molecular properties. *Nucleic Acids Res*, **36**, 3101-3117.
